# Supplementary material for: 3D polymer objects with electronic components interconnected via conformally printed electrodes
Source: Royal Society of Chemistry journal article supplement (doi:10.1039/c7nr04111j), 2017-01-01
Supplement: c7nr04111j2.pdf [file c7nr04111j2.pdf]

## Supplementary Information

### 3D printed polymer objects with embedded electronics interconnected via conformally printed electrodes

Yejin Jo,<sup>a,b</sup> Ju Young Kim,<sup>a</sup> Sungmook Jung,<sup>a</sup> Bok Yeop Ahn,<sup>c</sup> Jennifer A. Lewis,<sup>c</sup>  
Youngmin Choi,<sup>a,b,\*</sup> Sunho Jeong<sup>a,b,\*</sup>

<sup>a</sup>Division of Advanced Materials, Korea Research Institute of Chemical Technology (KRICT), 19 Sinseongno, Yuseong-gu, Daejeon 305-600, Korea. E-mail: youngmin@kRICT.re.kr; sjeong@kRICT.re.kr

<sup>b</sup>Department of Chemical Convergence Materials, Korea University of Science and Technology (UST), 217 Gajeongno, Yuseong-gu, Daejeon 305-350, Korea.

<sup>c</sup>Wyss Institute for Biologically Inspired Engineering, John A. Paulson School of Engineering and Applied Sciences, Harvard University, Cambridge, MA 02138, USA

**KEYWORDS:** 3D printing, electronics, conformal, conductive inks

## Experimental Methods

Conductive Inks: We first synthesized amine-functionalized, multi-walled carbon nanotubes (NH<sub>2</sub>-MWCNTs). A mixture composed of 1.4 g of MWCNT (97%, length: about 10 μm, Applied Carbon Nano Co. Ltd.), 0.35 g of perylene-3,4,9,10-tetracarboxylic dianhydride (PTDA, 97%, Aldrich), 350 mL of methylene chloride (99.5%, Samchun), 70 mL of triethylamine (99%, Samchun), and 14 mL of ethylenediamine (≥99%, Aldrich) is sonicated for 1 h and stirred vigorously for 24 h. The mixture is centrifuged and the precipitate is washed by methanol, methylene chloride and methanol (in that order) by centrifugation, followed by drying in a vacuum overnight. The poly(acrylic acid)-capped silver nanoparticles are synthesized by chemical reduction of Ag ions in DI water. To prevent agglomeration, polyvinylpyrrolidone (PVP, average MW ~10,000) and poly(acrylic acid) (PAA, sodium salt, average Mw ~15,000, 35 wt% in H<sub>2</sub>O) are incorporated as surface-capping molecules and sodium borohydride is used as a reducing agent. In a typical procedure, 4.7 g of Ag nitrate (99.9%, Kojima Chemicals), 3.8 g of poly(acrylic acid), and 6.0 g of PVP were added to a three-necked, round-bottom flask containing 100 mL of DI water at a pH of 11. The resultant solution is heated to 60°C and stirred with a magnetic stirrer under a refluxing condition. When the temperature reaches 60°C, 9.7 g of aqueous sodium borohydride (98.5%, Kojima Chemicals) solution (pH = 11) is injected. After reacting for 60 min at 60°C, the synthesized Ag nanoparticles are selectively separated by centrifugation, followed by washing by DI water. To decorate the NH<sub>2</sub>-MWCNTs with the PAA-capped Ag nanoparticles, 50 g of an aqueous NH<sub>2</sub>-MWCNT solution with a concentration of 3 mg/ml is mixed with 6.75 g of an aqueous poly(acrylic acid) capped-Ag NP solution at a concentration of 20 wt%. After a subsequent sonication/homogenization process, the mixture is centrifuged to collect the PAA-Ag/NH<sub>2</sub>-MWCNT hybrid material. The precipitates are then dispersed in DI water, followed by

adjusting the pH to 4. After the centrifugation process, precipitates are re-dispersed in ethyl alcohol, followed by centrifugation. The resultant precipitates are then mixed with a proper amount of Ag flakes (SF120, Ames Advanced Materials Corporation) and 50 g of toluene. After centrifugation, the precipitates are mixed manually with a proper amount of polystyrene-polyisoprene-polystyrene (SIS, styrene 22%, 12 poise @ 25 wt% in toluene, Aldrich) and 1,3-dichlorobenzene ( $\geq 99.0\%$ , Aldrich) in an agate mortar for 3 min. The weight fraction of conductive fillers to SIS is kept constant at 0.94 and the total solid loading is varied from 65 – 84 wt% .

**Ink Rheology:** The ink rheology was measured using a controlled-stress rheometer (MCR 101, Anton Paar). The elastic shear ( $G'$ ) and viscous loss ( $G''$ ) moduli were measured in oscillatory mode as a function of controlled shear stress (1 – 10,000 Pa) at a frequency of 1 Hz with increasing amplitude sweep.

**3D Polymer Objects with Embedded Electronics:** Stereolithography (SLA) is used to print 3D polymer objects (Form2, Formlabs). A layer thickness is 50  $\mu\text{m}$ , and a spot size of laser (with an intensity of 250 mW) is 140  $\mu\text{m}$ . All conductive inks are printed using a programmable dispenser (Image Master 350PC Smart, Musashi) equipped with a nozzle with an inner diameter of 350  $\mu\text{m}$ . We carried out all printing processes at room temperature without heating the stage. The printing speed and air pressure are 0.2-5 mm/sec and 100-200 kPa, respectively. The printed features are annealed at 80  $^{\circ}\text{C}$  for 1 h prior to carrying out electrical conductivity measurements, while features printed conformally and within the 3D polymer objects are dried for longer time ( $> 1$  h) at room temperature. All electrical components are placed in surface and internal cavities within the SLA-printed polymer objects.

**Structural and Electrical Characterization:** The morphology of the printed features is measured by scanning electron microscopy (SEM, JSM-6700, JEOL) and optical microscopy (OM, BX

51, Olympus). The electrical resistance of the printed features is determined using an interactive digital source meter (2450, Keithley).

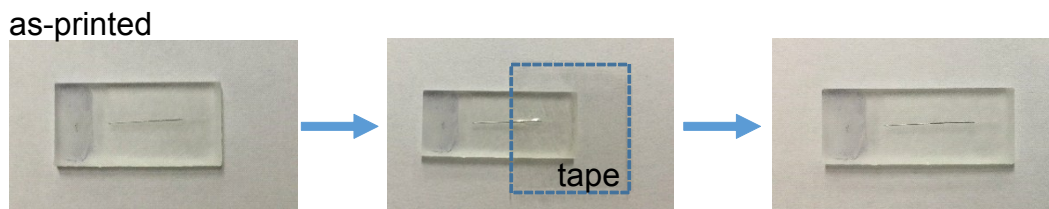

**Figure S1.** Photographs showing an adhesion tape-test for the electrode formed on SLA-printed polymer structure.

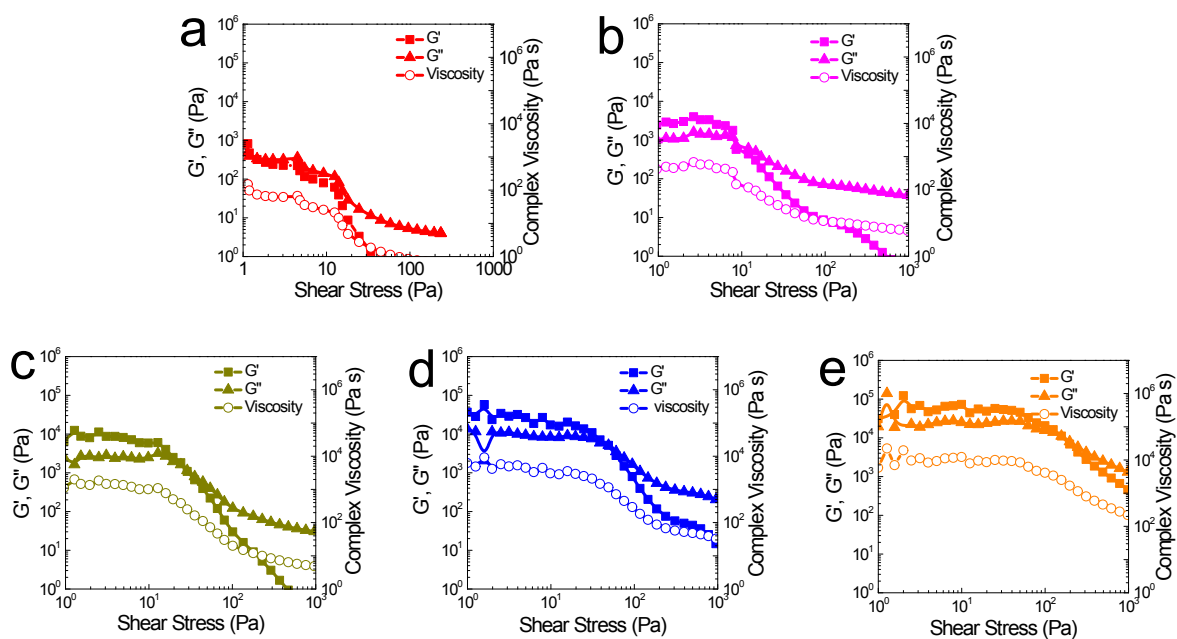

**Figure S2.** Rheological properties of conductive inks with different solids loadings of (a) 60 wt%, (b) 65 wt%, (c) 70 wt%, (d) 77 wt%, and (e) 84 wt%.

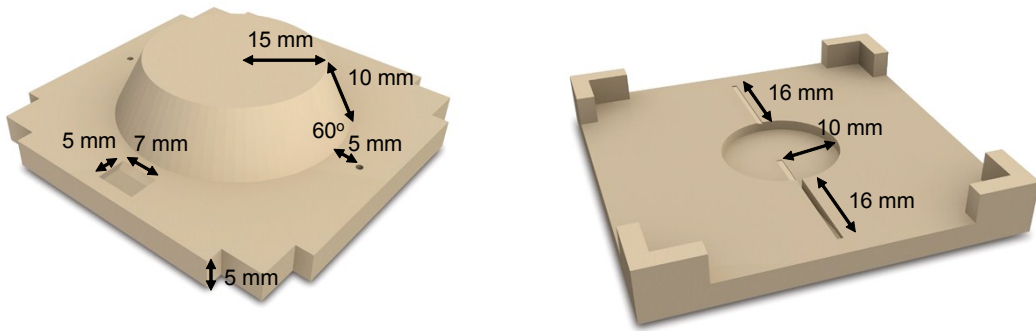

**Figure S3.** Schematics showing the actual dimensions of the 3D-printed embedded circuit

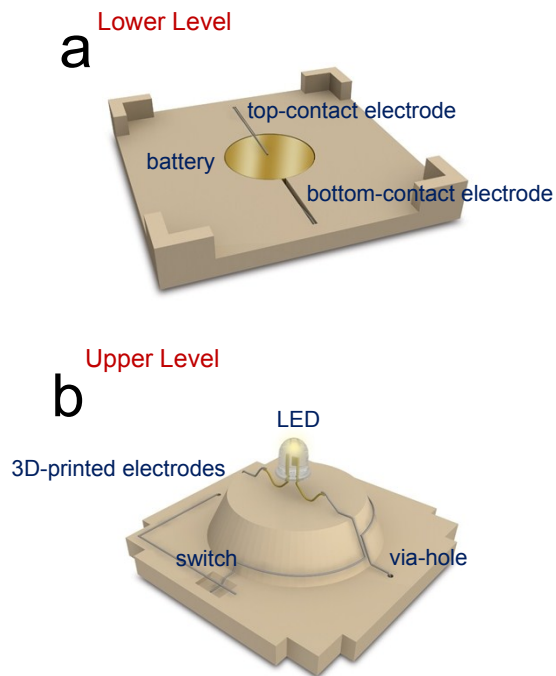

**Figure S4.** Schematics showing the lower and upper levels of the 3D-printed embedded circuit.

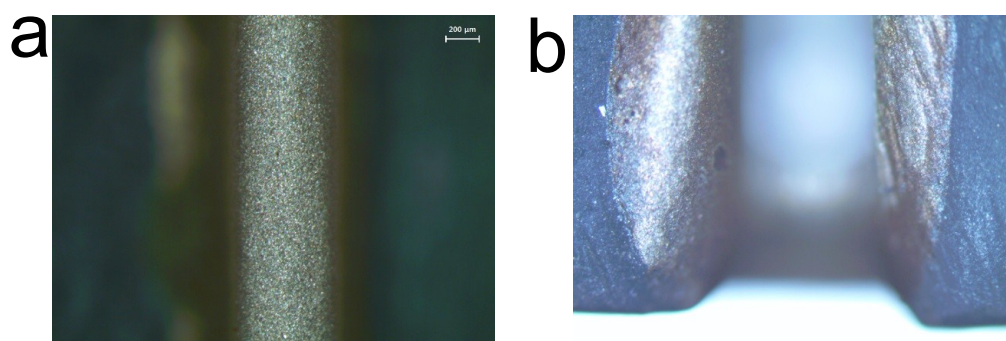

**Figure S5.** Optical images of electrodes printed within trenches: (a) bottom and (b) top surfaces, respectively.

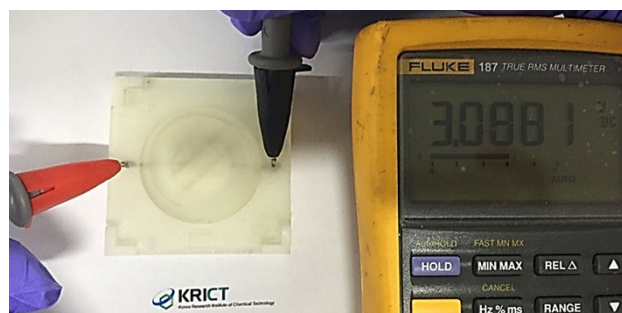

**Figure S6.** Photograph of a well-formed interconnection between the lower and upper levels showing the voltage output of the battery embedded on the lower level.

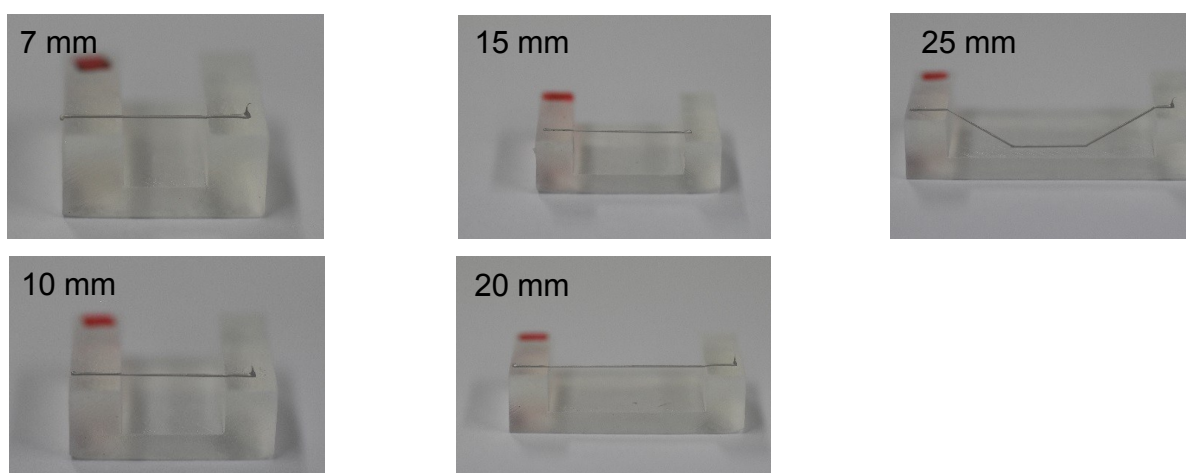

**Figure S7.** Photographs of electrodes suspended on the wells with different length.

**Movie S1.** Video of conformal printing of conductive electrodes on the upper level of a 3D polymer object.

**Movie S2.** Video of conformal printing of conductive electrodes on the upper level of a 3D polymer object.

**Movie S3.** Video of the printing process for fabricating the pressure-sensitive switch with an air gap.

**Movie S4.** Video of the operation of a 3D polymer object with embedded electrical components.

**Movie S5.** Video of the operation of a 3D polymer object with embedded printed circuit board.
